# Supplementary material
Source: publisher site journal article supplement (https://www.spandidos-publications.com/958/downloadSupplementary)
Supplement: Supplementary file 1 [file downloadSupplementary]

## Sheet: Supplementary Table 1
Table S1: The RNA expression matrices correlated with cervical cancer in different age groups.
Symbol	type
AC092835.2	mRNAdown
CDH4	mRNAdown
CLDN24	mRNAdown
CYP27C1	mRNAdown
DCAF12L1	mRNAdown
DNAI2	mRNAdown
DPCR1	mRNAdown
FLG	mRNAdown
FUT3	mRNAdown
GCNT4	mRNAdown
HSD17B2	mRNAdown
IL18	mRNAdown
INA	mRNAdown
MICALCL	mRNAdown
MUC22	mRNAdown
MUC4	mRNAdown
MYO7B	mRNAdown
P2RX6	mRNAdown
PDZD2	mRNAdown
PRRG1	mRNAdown
RASGRF1	mRNAdown
RASSF10	mRNAdown
RNF39	mRNAdown
SAA1	mRNAdown
WNT7A	mRNAdown
ZFP42	mRNAdown
AP2B1	mRNAdown
ATP2C2	mRNAdown
C10orf107	mRNAdown
C20orf195	mRNAdown
CA10	mRNAdown
CAMK2N1	mRNAdown
CCDC144NL	mRNAdown
CCDC42B	mRNAdown
CCK	mRNAdown
CHST6	mRNAdown
CLCF1	mRNAdown
CORO6	mRNAdown
CRIM1	mRNAdown
CSF2	mRNAdown
DCUN1D5	mRNAdown
DNALI1	mRNAdown
ENKUR	mRNAdown
FAM167A	mRNAdown
FGF5	mRNAdown
FOXJ1	mRNAdown
GULP1	mRNAdown
HIST1H2AE	mRNAdown
HIST1H2BO	mRNAdown
HIST1H4H	mRNAdown
HOXB1	mRNAdown
INPP4B	mRNAdown
ISG15	mRNAdown
KL	mRNAdown
LIN28B	mRNAdown
MAFA	mRNAdown
PAEP	mRNAdown
PDE4A	mRNAdown
PRKCG	mRNAdown
PROM1	mRNAdown
ROR2	mRNAdown
SHANK1	mRNAdown
SLC13A3	mRNAdown
SLC35F3	mRNAdown
SLC6A14	mRNAdown
SPNS2	mRNAdown
SPON1	mRNAdown
TMEM123	mRNAdown
TMEM215	mRNAdown
VAV2	mRNAdown
VWA3A	mRNAdown
WNT3A	mRNAdown
ABCB11	mRNAdown
ACTN1	mRNAdown
ALDH3A1	mRNAdown
AQP6	mRNAdown
ATP6V1C2	mRNAdown
B3GNT3	mRNAdown
BCAR1	mRNAdown
C20orf141	mRNAdown
CAPSL	mRNAdown
CCDC8	mRNAdown
CFAP45	mRNAdown
COL12A1	mRNAdown
COL4A1	mRNAdown
COL4A2	mRNAdown
CSF3	mRNAdown
CTNNAL1	mRNAdown
CYP21A2	mRNAdown
DISP2	mRNAdown
DLL1	mRNAdown
FADS1	mRNAdown
FBLN2	mRNAdown
FGL1	mRNAdown
GDA	mRNAdown
HIST1H2AJ	mRNAdown
HIST1H2BJ	mRNAdown
HMGA2	mRNAdown
IL11	mRNAdown
KLK3	mRNAdown
MATN3	mRNAdown
PTRF	mRNAdown
PYROXD2	mRNAdown
RNF224	mRNAdown
SYT5	mRNAdown
TMC5	mRNAdown
TMEM45B	mRNAdown
TNFRSF11B	mRNAdown
TPPP3	mRNAdown
VAX1	mRNAdown
VWA2	mRNAdown
ZG16	mRNAdown
A4GALT	mRNAdown
AHNAK2	mRNAdown
AJAP1	mRNAdown
AMOTL2	mRNAdown
ANKRD2	mRNAdown
ANKRD36C	mRNAdown
ANKUB1	mRNAdown
APLN	mRNAdown
CD209	mRNAdown
CD59	mRNAdown
CFAP52	mRNAdown
CHGA	mRNAdown
CYSRT1	mRNAdown
DNAH5	mRNAdown
DNAI1	mRNAdown
DOK7	mRNAdown
FER1L6	mRNAdown
FOSL1	mRNAdown
GBX1	mRNAdown
GREB1L	mRNAdown
HIST1H2AD	mRNAdown
HIST1H2BD	mRNAdown
HIST1H2BM	mRNAdown
HPSE	mRNAdown
IFITM3	mRNAdown
IRS1	mRNAdown
KCNS1	mRNAdown
KLK8	mRNAdown
LAMA2	mRNAdown
LINC01207	mRNAdown
LY6K	mRNAdown
MISP	mRNAdown
MME	mRNAdown
MOCOS	mRNAdown
MYL2	mRNAdown
MYL7	mRNAdown
NALCN	mRNAdown
NAPRT	mRNAdown
NEFH	mRNAdown
PHYHD1	mRNAdown
PLK2	mRNAdown
PROSER2	mRNAdown
PTPRH	mRNAdown
RAB44	mRNAdown
RXFP1	mRNAdown
SDR16C5	mRNAdown
SLC44A4	mRNAdown
SLCO1B3	mRNAdown
SOCS2	mRNAdown
SPDEF	mRNAdown
SSC4D	mRNAdown
STEAP4	mRNAdown
TEX15	mRNAdown
TGFA	mRNAdown
TWIST2	mRNAdown
VGLL1	mRNAdown
ZNF662	mRNAdown
ADH7	mRNAup
APBA1	mRNAup
AS3MT	mRNAup
CPNE6	mRNAup
CYP4Z1	mRNAup
DDO	mRNAup
DNAJC5B	mRNAup
EGR4	mRNAup
FADS6	mRNAup
FSIP2	mRNAup
GABRB2	mRNAup
GAS2	mRNAup
GSTM2	mRNAup
INSM1	mRNAup
LHFPL1	mRNAup
LINC00086	mRNAup
MSGN1	mRNAup
NRXN1	mRNAup
PHGDH	mRNAup
RBM11	mRNAup
RPRM	mRNAup
RTN1	mRNAup
SLC6A12	mRNAup
SRRM3	mRNAup
TCEAL2	mRNAup
TRDN	mRNAup
TSPAN33	mRNAup
TSPAN7	mRNAup
XG	mRNAup
ZNF433	mRNAup
ADAMTSL3	mRNAdown
ANO4	mRNAdown
C11orf70	mRNAdown
C1QTNF4	mRNAdown
C9orf84	mRNAdown
CBLN2	mRNAdown
CCDC78	mRNAdown
CDKN2A	mRNAdown
COBL	mRNAdown
COL4A6	mRNAdown
CYP26B1	mRNAdown
DIO3	mRNAdown
EMR2	mRNAdown
EREG	mRNAdown
FAM216B	mRNAdown
GPR15	mRNAdown
HNF1B	mRNAdown
IL13RA2	mRNAdown
KIF12	mRNAdown
KLK11	mRNAdown
LMO7	mRNAdown
MAP3K19	mRNAdown
MESP2	mRNAdown
MSLNL	mRNAdown
MUC16	mRNAdown
MUC6	mRNAdown
MYOF	mRNAdown
NXNL2	mRNAdown
OTUD7A	mRNAdown
P2RY6	mRNAdown
PCDHGA9	mRNAdown
PEAR1	mRNAdown
PSORS1C1	mRNAdown
PYGL	mRNAdown
SCGB1D2	mRNAdown
SCGB2A2	mRNAdown
SH2D5	mRNAdown
SLC28A2	mRNAdown
TEKT1	mRNAdown
USP2	mRNAdown
VGLL3	mRNAdown
VMO1	mRNAdown
ZBED2	mRNAdown
AFAP1L2	mRNAdown
ARHGAP8	mRNAdown
C1orf64	mRNAdown
C9orf117	mRNAdown
CDH13	mRNAdown
CFD	mRNAdown
CFTR	mRNAdown
CRLF2	mRNAdown
CXCL6	mRNAdown
CXCR1	mRNAdown
GCK	mRNAdown
GLDC	mRNAdown
IRF7	mRNAdown
LGALS9B	mRNAdown
PCDHGB7	mRNAdown
PPP4R4	mRNAdown
PRG2	mRNAdown
PSG9	mRNAdown
PTGDR2	mRNAdown
RASGEF1A	mRNAdown
SLC4A11	mRNAdown
SLC5A5	mRNAdown
SLC5A8	mRNAdown
STAC	mRNAdown
TMEM132C	mRNAdown
TNNI2	mRNAdown
TRIM68	mRNAdown
AC002331.1	lncdown
AC004870.3	lncdown
AC006273.4	lncdown
AC006273.5	lncdown
AC007161.5	lncdown
AC011294.3	lncdown
AC016735.2	lncdown
AC021224.1	lncdown
AC034110.1	lncdown
AC068134.6	lncdown
AC092580.4	lncdown
AC093326.3	lncdown
AC139099.4	lncdown
AF064858.11	lncdown
ARRDC3-AS1	lncdown
C10orf91	lncdown
CTA-384D8.35	lncdown
CTB-75G16.3	lncdown
CTD-2005H7.2	lncdown
CTD-2623N2.5	lncdown
CTD-3252C9.4	lncdown
ELFN1-AS1	lncdown
FAM87A	lncdown
FLJ44511	lncdown
GS1-259H13.2	lncdown
GS1-600G8.5	lncdown
IBA57-AS1	lncdown
KIF25-AS1	lncdown
LINC00543	lncdown
LINC00605	lncdown
LINC00705	lncdown
LINC00706	lncdown
LINC00843	lncdown
LINC00863	lncdown
LINC00896	lncdown
LINC01126	lncdown
LINC01343	lncdown
MIR22HG	lncdown
PCAT14	lncdown
RP1-290I10.3	lncdown
RP1-93H18.1	lncdown
RP11-120M18.5	lncdown
RP11-130L8.2	lncdown
RP11-168K11.3	lncdown
RP11-253E3.3	lncdown
RP11-274B18.4	lncdown
RP11-304F15.6	lncdown
RP11-321G12.1	lncdown
RP11-329L6.2	lncdown
RP11-32B5.8	lncdown
RP11-339N8.1	lncdown
RP11-351J23.1	lncdown
RP11-356I2.1	lncdown
RP11-384F7.1	lncdown
RP11-384F7.2	lncdown
RP11-395E19.6	lncdown
RP11-413P11.1	lncdown
RP11-424M24.5	lncdown
RP11-430B1.2	lncdown
RP11-454P21.1	lncdown
RP11-467L19.16	lncdown
RP11-535M15.1	lncdown
RP11-546O6.4	lncdown
RP11-584P21.2	lncdown
RP11-626G11.1	lncdown
RP11-666A20.4	lncdown
RP11-738E22.3	lncdown
RP11-849F2.9	lncdown
RP11-862G15.1	lncdown
RP11-92J19.3	lncdown
RP4-585I14.3	lncdown
RP4-666F24.3	lncdown
RP4-806M20.4	lncdown
AC005224.2	lncdown
AC005256.1	lncdown
AC058791.1	lncdown
C11orf44	lncdown
C9orf170	lncdown
CASC16	lncdown
CCAT1	lncdown
CTA-217C2.2	lncdown
CTA-363E6.2	lncdown
CTB-114C7.4	lncdown
CTC-458G6.4	lncdown
CTD-2003C8.2	lncdown
CTD-2128A3.2	lncdown
CTD-2134A5.3	lncdown
CTD-2199O4.3	lncdown
CTD-2377D24.4	lncdown
CTD-2509G16.2	lncdown
DLX2-AS1	lncdown
EIF3J-AS1	lncdown
EPB41L4A-AS2	lncdown
FAM157B	lncdown
KB-1254G8.1	lncdown
LINC00159	lncdown
LINC00322	lncdown
LINC00524	lncdown
LINC00571	lncdown
LINC00911	lncdown
LINC00925	lncdown
LINC01506	lncdown
LINC01510	lncdown
MIR4435-1HG	lncdown
RP1-290I10.5	lncdown
RP11-1060G2.2	lncdown
RP11-110I1.12	lncdown
RP11-11N5.1	lncdown
RP11-13J8.1	lncdown
RP11-167H9.3	lncdown
RP11-16E12.1	lncdown
RP11-181E10.3	lncdown
RP11-217E13.1	lncdown
RP11-221N13.3	lncdown
RP11-28H5.2	lncdown
RP11-305P22.9	lncdown
RP11-311F12.1	lncdown
RP11-326C3.13	lncdown
RP11-356J5.12	lncdown
RP11-359E10.1	lncdown
RP11-370F5.4	lncdown
RP11-375I20.6	lncdown
RP11-390P24.1	lncdown
RP11-394I13.3	lncdown
RP11-404O13.1	lncdown
RP11-417E7.1	lncdown
RP11-439M11.1	lncdown
RP11-523L20.2	lncdown
RP11-54O7.17	lncdown
RP11-764K9.1	lncdown
RP11-791G15.2	lncdown
RP11-873E20.1	lncdown
RP11-890B15.2	lncdown
RP11-932O9.10	lncdown
RP3-416J7.4	lncdown
RP4-655C5.4	lncdown
RP4-758J18.10	lncdown
RP5-965G21.4	lncdown
RP6-91H8.2	lncdown
SALRNA1	lncdown
SERPINB9P1	lncdown
SFTA1P	lncdown
SNHG19	lncdown
AC004448.5	lncup
AC005537.2	lncup
AC007228.5	lncup
AC011298.2	lncup
AC011747.3	lncup
AC016730.1	lncup
AC074389.5	lncup
AC079610.2	lncup
AC092484.1	lncup
AC092635.1	lncup
AC115522.3	lncup
AP000473.5	lncup
AP001065.15	lncup
AP001172.2	lncup
C12orf77	lncup
CASC17	lncup
CASC9	lncup
CTA-150C2.13	lncup
CTB-32O4.4	lncup
CTD-2341M24.1	lncup
KC6	lncup
LINC00114	lncup
LINC00237	lncup
LINC00398	lncup
LINC00637	lncup
LINC00640	lncup
LINC00698	lncup
LINC00954	lncup
LINC01133	lncup
LINC01249	lncup
OTX2-AS1	lncup
RP1-209A6.1	lncup
RP1-40E16.9	lncup
RP1-79C4.4	lncup
RP11-1038A11.1	lncup
RP11-135J2.3	lncup
RP11-14K3.7	lncup
RP11-209E8.1	lncup
RP11-267M23.4	lncup
RP11-268G12.1	lncup
RP11-328N19.1	lncup
RP11-329B9.5	lncup
RP11-338N10.1	lncup
RP11-344B5.2	lncup
RP11-400K9.4	lncup
RP11-474O21.5	lncup
RP11-48G14.1	lncup
RP11-543D5.1	lncup
RP11-636O21.1	lncup
RP11-756G20.1	lncup
RP11-834C11.4	lncup
RP11-848P1.3	lncup
RP11-855O10.2	lncup
RP11-875H7.5	lncup
RP11-90P13.1	lncup
RP11-923I11.5	lncup
RP11-958F21.1	lncup
RP3-369A17.4	lncup
RP4-564F22.7	lncup
RP4-680D5.9	lncup
RP5-1185K9.1	lncup
RP5-839B4.8	lncup
RP5-899B16.1	lncup
TRBV11-2	lncup
AC005042.5	lncup
AC005592.1	lncup
AC006946.17	lncup
AC009262.2	lncup
AC018359.1	lncup
AC090505.6	lncup
AL035610.2	lncup
CTB-12O2.1	lncup
CTB-32O4.3	lncup
CTC-459F4.3	lncup
CTD-2135D7.5	lncup
CTD-2287O16.4	lncup
CTD-2339F6.1	lncup
CTD-3116E22.8	lncup
FLJ38122	lncup
LINC00092	lncup
LINC00403	lncup
LINC00668	lncup
LINC00840	lncup
LINC00885	lncup
LINC00987	lncup
LINC01095	lncup
LINC01139	lncup
LINC01258	lncup
LINC01500	lncup
MIR4500HG	lncup
PTPRD-AS1	lncup
RP1-10C16.1	lncup
RP1-137D17.1	lncup
RP1-170O19.14	lncup
RP1-56K13.5	lncup
RP1-90G24.11	lncup
RP1-90G24.6	lncup
RP11-108M12.3	lncup
RP11-10J5.1	lncup
RP11-1134I14.8	lncup
RP11-161D15.1	lncup
RP11-212I21.2	lncup
RP11-235G24.1	lncup
RP11-266K4.13	lncup
RP11-286B14.1	lncup
RP11-287D1.4	lncup
RP11-317P15.4	lncup
RP11-349K16.1	lncup
RP11-384O8.1	lncup
RP11-397A16.1	lncup
RP11-400K9.3	lncup
RP11-445N20.3	lncup
RP11-445P17.3	lncup
RP11-461L13.3	lncup
RP11-471M2.3	lncup
RP11-497G19.7	lncup
RP11-571L19.8	lncup
RP11-643C9.2	lncup
RP11-728K20.3	lncup
RP11-73K9.3	lncup
RP11-763E3.1	lncup
RP11-849I19.1	lncup
RP11-89C3.4	lncup
RP4-710M16.2	lncup
RP4-813D12.3	lncup
RP5-899E9.1	lncup
RP5-942I16.1	lncup
SAMD12-AS1	lncup
TP53TG1	lncup
XXbac-BPGBPG55C20.3	lncup
ZBTB20-AS4	lncup
hsa-miR-499a	mirup
hsa-miR-133a-2	mirup
hsa-miR-4449	mirup
hsa-miR-10b	mirup
hsa-miR-887	mirup
hsa-miR-592	mirup
hsa-miR-612	mirup
hsa-miR-99a	mirup
hsa-miR-9-1	mirdown
hsa-miR-9-2	mirdown
hsa-miR-330	mirdown
hsa-miR-5699	mirdown
hsa-miR-625	mirdown
hsa-miR-3065	mirdown
hsa-miR-95	mirdown
hsa-miR-503	mirdown
